# Supplementary material for: Southern Weddell Sea surface freshwater flux modulated by icescape and atmospheric forcing
Source: Copernicus journal article supplement (doi:10.5194/os-19-1791-2023), 2023-12-14
Supplement: Supplementary file 1 [file os-19-1791-2023-supplement.pdf]

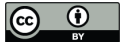

*Supplement of*

## **Southern Weddell Sea surface freshwater flux modulated by icescape and atmospheric forcing**

**Lukrecia Stulic et al.**

*Correspondence to:* Lukrecia Stulic (lstulic@awi.de)

The copyright of individual parts of the supplement might differ from the article licence.

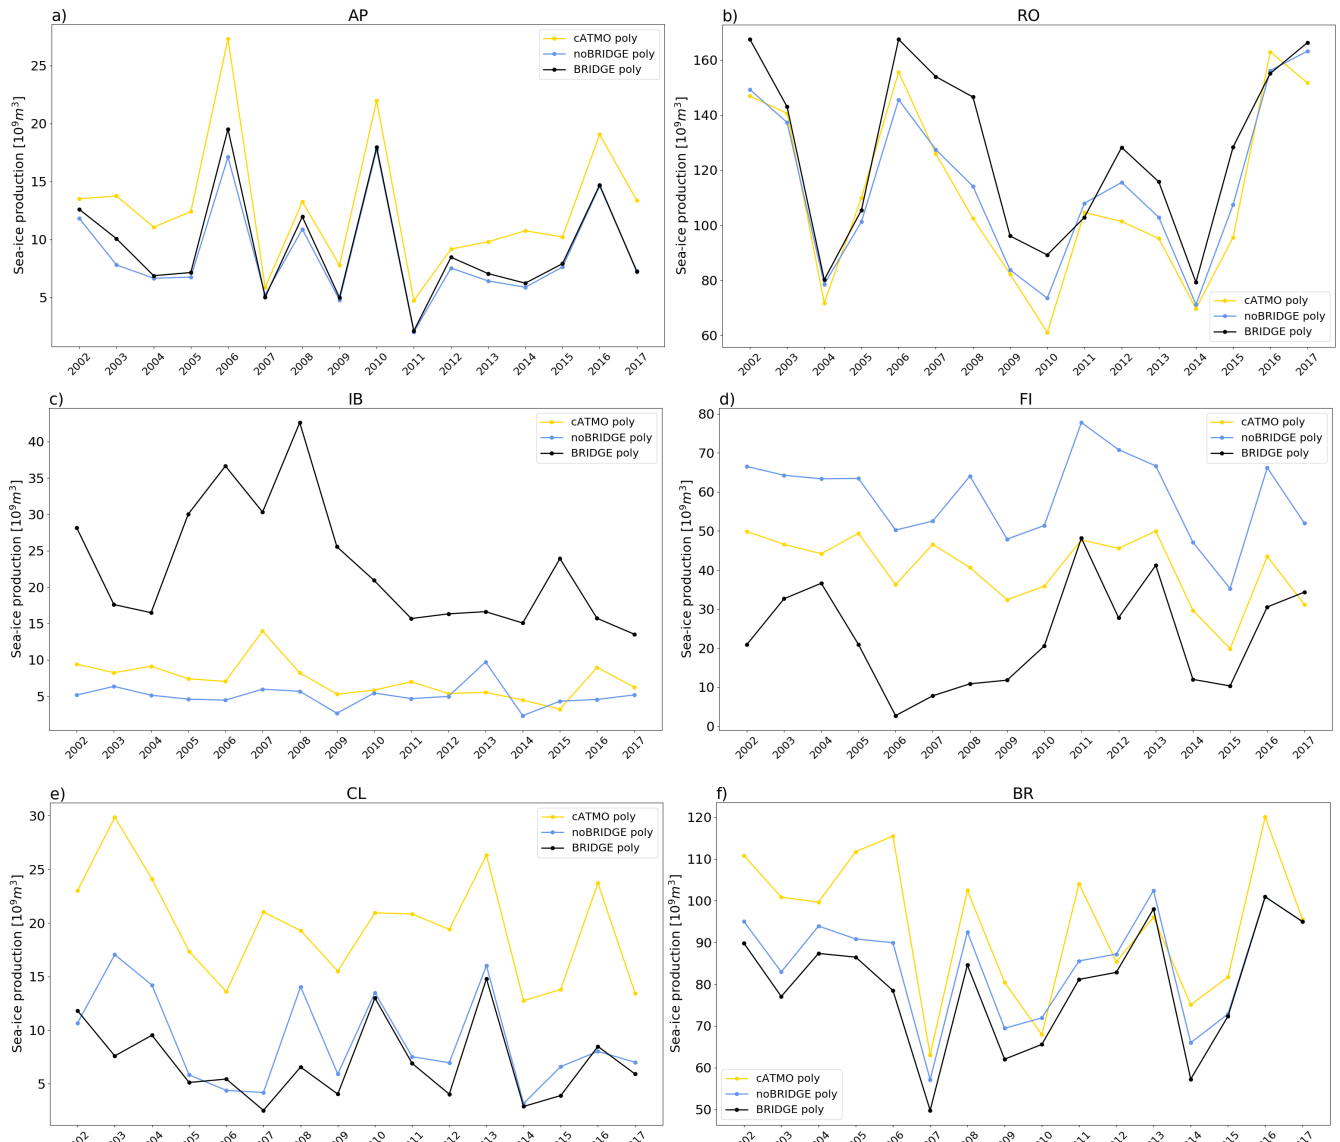

**Supplement figure 1.** Time-series of the cumulative polynya ice-production (2002–2017) in the southern Weddell Sea from FESOM experiments for the six sub-regions shown in Fig.1.
